# Supplementary material for: Identifying structural distortion in doped VO2 with IR spectroscopy
Source: Royal Society of Chemistry journal article supplement (doi:10.1039/c2cp40392g), 2012-01-01
Supplement: c2cp40392g.pdf [file c2cp40392g.pdf]

## Supplementary Information

### Identifying structural distortion in doping VO<sub>2</sub> with IR spectroscopy

**Ran Long, Bingyan Qu, Renchang Tan, Yongfu Sun, Xiaogang Tan, Wu Ying, Bicao Pan,  
Yujie Xiong\* and Yi Xie\***

*Hefei National Laboratory for Physical Sciences at Microscale, University of Science &  
Technology of China, Hefei, 230026, P.R. China*

*\*Corresponding author. E-mail: [yjxiong@ustc.edu.cn](mailto:yjxiong@ustc.edu.cn), [yxie@ustc.edu.cn](mailto:yxie@ustc.edu.cn)*

### **Experimental Procedure:**

Analytical grade vanadyl acetylacetonate ( $\text{VO}(\text{acac})_2$ ) and sodium tungstate ( $\text{Na}_2\text{WO}_4$ ) were purchased from Sigma Aldrich and used without further purification. In a typical synthesis, the following chemicals were added to a Teflon-lined stainless autoclave with capacity of 50 mL: 1 mmol  $\text{VO}(\text{acac})_2$ , an appropriate amount of  $\text{Na}_2\text{WO}_4$  and 40 mL of distilled water. After the mixture was stirred to a dark-green suspension, the autoclave was sealed and heated at 200 °C for 24 hours and cooled to the room temperature afterwards. Dark-blue precipitate was washed with water and ethanol several times, and then dried at 60 °C for 6 hours. This precursor was heated at 600 °C for 12 hours in a flowing Ar atmosphere. The product was obtained through this thermal treatment process.  $\text{VO}_2$  products with different tungsten doping concentrations were prepared by add  $\text{Na}_2\text{WO}_4$  in the Teflon-lined: sample (a) with 2 ml of  $\text{Na}_2\text{WO}_4$  solution, sample (b) with 4.5 ml of  $\text{Na}_2\text{WO}_4$  solution and sample (c) with 5 ml of  $\text{Na}_2\text{WO}_4$  solution. The concentration of  $\text{Na}_2\text{WO}_4$  solution was 0.01 mol/L.

### **Instrumentation:**

XRD patterns were recorded on a Philips X'Pert Pro Super diffractometer with Cu  $K\alpha$  radiation ( $\lambda=1.54178 \text{ \AA}$ ). Differential scanning calorimetry (DSC) analysis was carried out on a Netzsch DSC 200F3 in a high-purity  $\text{N}_2$  flowing atmosphere in a temperature range from 0 to 80 °C. Fourier transform infrared (FTIR) spectroscopy was carried out on a Nicolet 8700 FTIR in a KBr pellet scanning from 4000 to 400  $\text{cm}^{-1}$  and in a polypropylene pellet scanning from 500 to 200  $\text{cm}^{-1}$ , respectively. FTIR measurements were performed at several fixed temperature as follows: 25 °C, 40 °C, 60 °C, 62 °C, 64 °C, 66 °C, 68 °C, 70 °C, 75 °C and 80°C. The concentrations of elements were measured with a Thermo Scientific PlasmaQuad 3 inductively-coupled plasma mass spectrometry (ICP-MS) after dissolving them with a mixture of HCl and  $\text{HNO}_3$  (3:1, volume ratio).

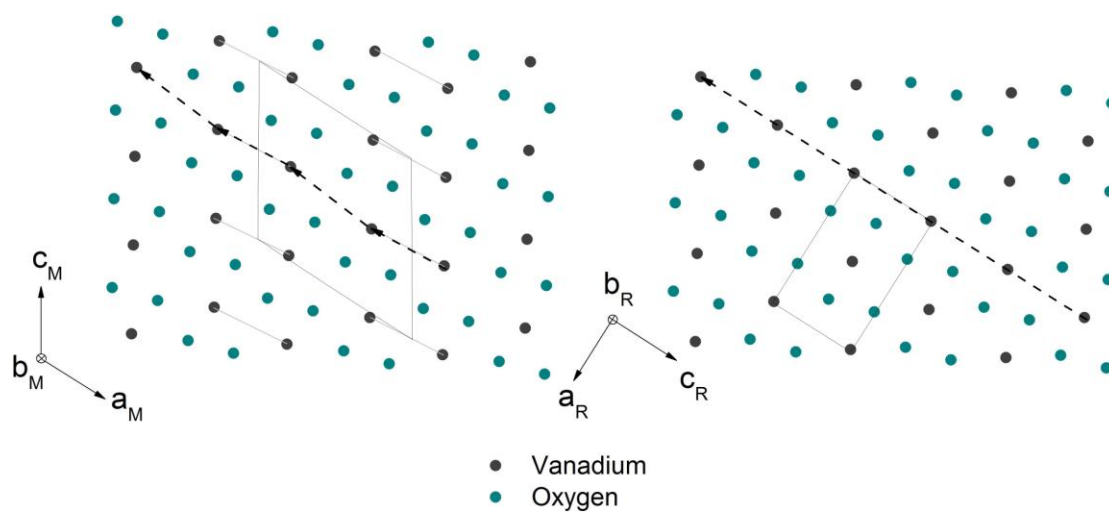

**Fig. S1.** Microscopic structure of monoclinic and rutile  $\text{VO}_2$  projected along  $[010]$  axis.

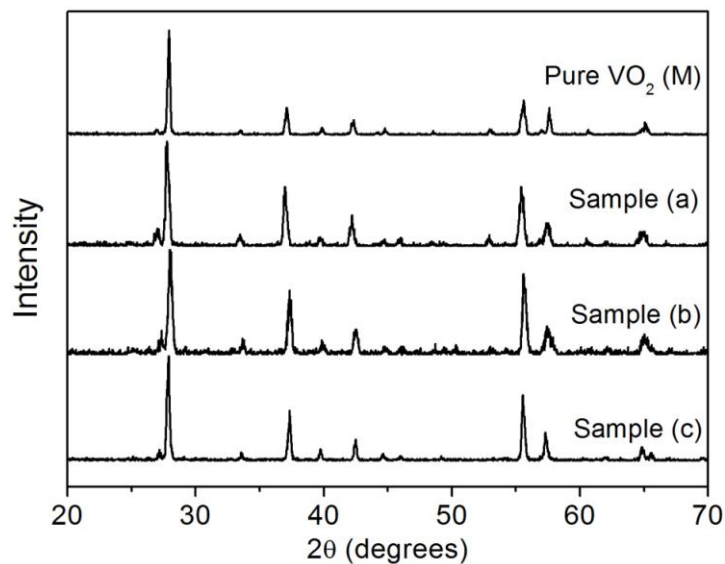

**Fig. S2.** Powder X-ray diffraction pattern for VO<sub>2</sub> (M) and V<sub>1-x</sub>W<sub>x</sub>O<sub>2</sub> doped samples with different doping dose: (a)  $x=0.0017$ ; (b)  $x=0.0038$ ; and (c)  $x=0.0069$ . The patterns can be clearly indexed to monoclinic VO<sub>2</sub> (M) (Joint Committee on Powder Diffraction Standards, JCPDS No. 82-0661) with the space group P2<sub>1</sub>/c. There was no peak that can be detected and assigned to other crystal phases of vanadium oxides or tungsten oxides, indicating that the doping of tungsten brings no impurities into the final products. Moreover, no obvious peak shifting has been observed in the XRD patterns accompanied with the doping process.

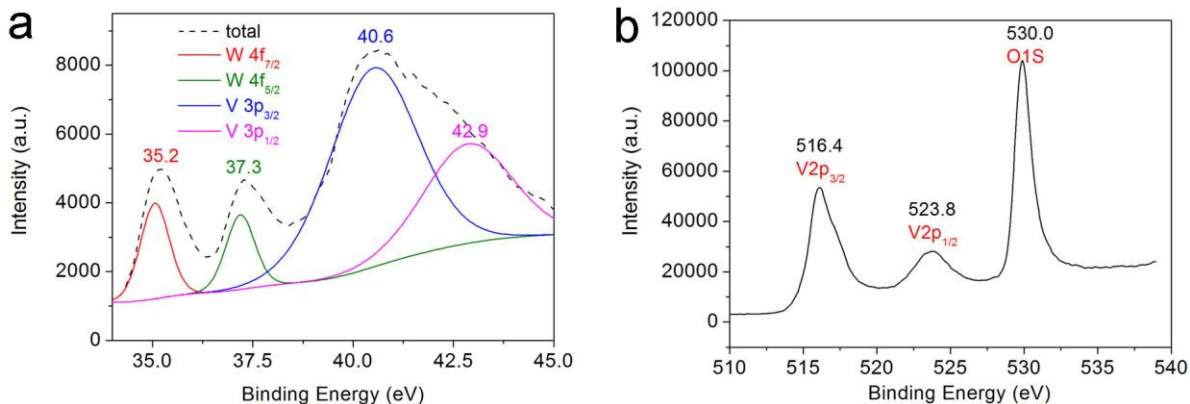

**Fig. S3.** X-ray photoelectron spectroscopy (XPS) data of doped VO<sub>2</sub> sample (a). The V2p corelevel spectrum shows that the observed value of the binding energy (516.4 eV) for V2p<sub>3/2</sub> is in good agreement with the literature value of bulk-phase V<sup>4+</sup>. In addition, the binding energy difference ( $\Delta$ ) between the O1s and V2p<sub>3/2</sub> levels was used to determine the oxidation state of the vanadium oxide. The  $\Delta$  value of 13.6 eV in our sample approaches that reported in the literature for V<sup>4+</sup>. Thus the XPS spectra clearly reveal that vanadium is in the +4 valence state in the as-obtained sample, without any presence of the +5 valence state. Overall, XPS data confirm that all the vanadium remains the oxidation state of V(IV) in the doped sample. The oxidation state of tungsten has been determined to W(VI).

1. C. D. Wagner, W. M. Riggs, L. E. Davis and J. F. Moulder, *Handbook of X-Ray Photoelectron Spectroscopy*, Ed: G. E. Muilenberg, Perkin-Elmer, 1979.
2. G. A. Sawatzky and D. Post, *Phys. Rev. B*, 1979, **20**, 1546.

Table S1: Calculation results for atom site and displacement in absolute coordinates for different modes of pure VO<sub>2</sub> (M). X, Y and Z denote the absolute coordinates of atom locations, and dx, dy and dz denote the displacement of atoms.

Mode no. 1:

|   | X        | Y        | Z        | dx       | dy       | dz       |
|---|----------|----------|----------|----------|----------|----------|
| V | 1.118434 | 4.539165 | -0.57041 | -0.07503 | 0.134447 | -0.18603 |
| V | 3.66241  | 2.22205  | 0.248908 | 0.075034 | 0.134447 | 0.186031 |
| V | 3.715416 | 0.095064 | 2.976174 | -0.07503 | 0.134447 | -0.18603 |
| V | 1.17144  | 2.412178 | 2.156853 | 0.075034 | 0.134447 | 0.186031 |
| O | 0.523744 | 0.996852 | 0.84834  | -0.16467 | -0.00456 | -0.04612 |
| O | 1.920627 | 3.23531  | 0.452643 | -0.27251 | -0.24862 | -0.16233 |
| O | 4.2571   | 3.313967 | -1.16985 | 0.164672 | -0.00456 | 0.046119 |
| O | 2.860216 | 0.918196 | -0.77415 | 0.272508 | -0.24862 | 0.162325 |
| O | 4.310106 | 3.637376 | 1.557421 | -0.16467 | -0.00456 | -0.04612 |
| O | 2.913222 | 1.398918 | 1.953117 | -0.27251 | -0.24862 | -0.16233 |
| O | 0.57675  | 1.320262 | 3.575606 | 0.164672 | -0.00456 | 0.046119 |

Mode no. 2:

|   | X        | Y        | Z        | dx       | dy       | dz       |
|---|----------|----------|----------|----------|----------|----------|
| V | 1.118434 | 4.539165 | -0.57041 | 0.169492 | -0.29789 | -0.10059 |
| V | 3.66241  | 2.22205  | 0.248908 | 0.169492 | 0.297889 | -0.10059 |
| V | 3.715416 | 0.095064 | 2.976174 | 0.169492 | -0.29789 | -0.10059 |
| V | 1.17144  | 2.412178 | 2.156853 | 0.169492 | 0.297889 | -0.10059 |
| O | 0.523744 | 0.996852 | 0.84834  | -0.12909 | -0.16291 | 0.023916 |
| O | 1.920627 | 3.23531  | 0.452643 | -0.17993 | -0.15464 | 0.149518 |
| O | 4.2571   | 3.313967 | -1.16985 | -0.12909 | 0.162908 | 0.023916 |
| O | 2.860216 | 0.918196 | -0.77415 | -0.17993 | 0.154641 | 0.149518 |
| O | 4.310106 | 3.637376 | 1.557421 | -0.12909 | -0.16291 | 0.023916 |
| O | 2.913222 | 1.398918 | 1.953117 | -0.17993 | -0.15464 | 0.149518 |
| O | 0.57675  | 1.320262 | 3.575606 | -0.12909 | 0.162908 | 0.023916 |

Mode no. 3:

|   | X        | Y        | Z        | dx       | dy       | dz       |
|---|----------|----------|----------|----------|----------|----------|
| V | 1.118434 | 4.539165 | -0.57041 | -0.19317 | -0.29969 | 0.118239 |
| V | 3.66241  | 2.22205  | 0.248908 | -0.19317 | 0.299686 | 0.118239 |
| V | 3.715416 | 0.095064 | 2.976174 | -0.19317 | -0.29969 | 0.118239 |
| V | 1.17144  | 2.412178 | 2.156853 | -0.19317 | 0.299686 | 0.118239 |
| O | 0.523744 | 0.996852 | 0.84834  | 0.175131 | -0.15545 | -0.11969 |
| O | 1.920627 | 3.23531  | 0.452643 | 0.172251 | -0.00927 | -0.09988 |
| O | 4.2571   | 3.313967 | -1.16985 | 0.175131 | 0.155449 | -0.11969 |
| O | 2.860216 | 0.918196 | -0.77415 | 0.172251 | 0.009267 | -0.09988 |
| O | 4.310106 | 3.637376 | 1.557421 | 0.175131 | -0.15545 | -0.11969 |
| O | 2.913222 | 1.398918 | 1.953117 | 0.172251 | -0.00927 | -0.09988 |
| O | 0.57675  | 1.320262 | 3.575606 | 0.175131 | 0.155449 | -0.11969 |

Mode no. 4

|   | X        | Y        | Z        | dx       | dy       | dz       |
|---|----------|----------|----------|----------|----------|----------|
| V | 1.118434 | 4.539165 | -0.57041 | 0.021622 | -0.0351  | 0.165412 |
| V | 3.66241  | 2.22205  | 0.248908 | -0.02162 | -0.0351  | -0.16541 |
| V | 3.715416 | 0.095064 | 2.976174 | 0.021622 | -0.0351  | 0.165412 |
| V | 1.17144  | 2.412178 | 2.156853 | -0.02162 | -0.0351  | -0.16541 |
| O | 0.523744 | 0.996852 | 0.84834  | -0.04421 | -0.0767  | 0.155486 |
| O | 1.920627 | 3.23531  | 0.452643 | -0.36886 | 0.135652 | 0.185654 |
| O | 4.2571   | 3.313967 | -1.16985 | 0.044205 | -0.0767  | -0.15549 |
| O | 2.860216 | 0.918196 | -0.77415 | 0.368859 | 0.135652 | -0.18565 |
| O | 4.310106 | 3.637376 | 1.557421 | -0.04421 | -0.0767  | 0.155486 |
| O | 2.913222 | 1.398918 | 1.953117 | -0.36886 | 0.135652 | 0.185654 |
| O | 0.57675  | 1.320262 | 3.575606 | 0.044205 | -0.0767  | -0.15549 |

Mode no. 5:

|   | X        | Y        | Z        | dx       | dy       | dz       |
|---|----------|----------|----------|----------|----------|----------|
| V | 1.118434 | 4.539165 | -0.57041 | 0.047299 | 0.072851 | -0.01648 |
| V | 3.66241  | 2.22205  | 0.248908 | -0.0473  | 0.072851 | 0.016475 |
| V | 3.715416 | 0.095064 | 2.976174 | 0.047299 | 0.072851 | -0.01648 |
| V | 1.17144  | 2.412178 | 2.156853 | -0.0473  | 0.072851 | 0.016475 |
| O | 0.523744 | 0.996852 | 0.84834  | -0.28416 | 0.029075 | 0.077619 |
| O | 1.920627 | 3.23531  | 0.452643 | 0.15089  | -0.16559 | 0.323073 |
| O | 4.2571   | 3.313967 | -1.16985 | 0.284164 | 0.029075 | -0.07762 |
| O | 2.860216 | 0.918196 | -0.77415 | -0.15089 | -0.16559 | -0.32307 |
| O | 4.310106 | 3.637376 | 1.557421 | -0.28416 | 0.029075 | 0.077619 |
| O | 2.913222 | 1.398918 | 1.953117 | 0.15089  | -0.16559 | 0.323073 |
| O | 0.57675  | 1.320262 | 3.575606 | 0.284164 | 0.029075 | -0.07762 |
